# Supplementary material
Source: PubMed Central journal article supplement (PMC8287644)
Supplement: NIHMS1579890-supplement-Table_S1.pdf [file NIHMS1579890-supplement-Table_S1.pdf]

| ID   | GA at birth | Weight at Birth (g) | PMA at testing | Clinical Scenario prompting testing                                                                                                            | Indication | Year | Concurrent Diagnoses                                                                             | Significant Infectious History                                    |
|------|-------------|---------------------|----------------|------------------------------------------------------------------------------------------------------------------------------------------------|------------|------|--------------------------------------------------------------------------------------------------|-------------------------------------------------------------------|
| P-1  | 23 5/7      | 433                 | 52             | Readmitted at 6 months for worsening BPD symptoms                                                                                              | History    | 2006 | BPD                                                                                              |                                                                   |
| P-2  | 25          | 737                 | 37             | Culture negative sepsis                                                                                                                        | History    | 2006 | Duodenal atresia, grade II IVH, ROP, TPN cholestasis, anasarca                                   | Culture negative sepsis, nasal bridge cellulitis                  |
| P-3  | 24 1/7      | 640                 | 56             | Readmitted at 7 months for infection - abdominal distension, emesis, lethargy; found to have <i>S. aureus</i> bacteremia, pericardial effusion | History    | 2006 | BPD, GI dysmotility, grade II IVH, ROP                                                           | Proteus pneumonia, Staph sepsis, possible c. diff infection       |
| P-4  | 28          | 1315                | 32             | DiGeorge syndrome                                                                                                                              | History    | 2009 | Tetralogy of Fallot, pulmonary stenosis, DiGeorge syndrome, grade II IVH                         |                                                                   |
| P-5  | 24 3/7      | 400                 | 40             | Low TRECS                                                                                                                                      | TRECS      | 2009 | IUGR, BPD, CMV-postnatal, cerebellar hemorrhages                                                 | E. coli sepsis, acquired CMV, serratia marcesces, CONS bacteremia |
| P-6  | 27          | 870                 | 51             | Transferred to our hospital at 5 months for second opinion; immunology consulted for history of prolonged diarrhea and infections              | History    | 2010 | BPD, GI dysmotility, grade II IVH, ROP                                                           | Oral thrush, persistent diarrhea                                  |
| P-7  | 25          | 520                 | 47             | <i>S. aureus</i> bacteremia, diffuse osteomyelitis with abscesses                                                                              | History    | 2010 | BPD, pulmonary hypertension, grade IV IVH                                                        | MRSA bacteremia, abscesses, osteomyelitis; persistent thrush      |
| P-8  | 26 3/7      | 623                 | 54             | Unclear, not mentioned in any note                                                                                                             | History    | 2010 | NEC, short gut, TPN cholestasis-transferred for omegavan                                         | E.coli bacteremia and UTI                                         |
| P-9  | 27 6/7      | 1020                | 40             | Readmitted to NICU from home with respiratory symptoms, high illness severity                                                                  | History    | 2011 | Medical NEC                                                                                      | Hemophilus and moraxella pneumonia                                |
| P-10 | 23 1/7      | 510                 | 31             | Low TRECS on 2 newborn screens                                                                                                                 | TRECS      | 2011 | Severe BPD, NEC, TPN-associated liver disease, osteopenia of prematurity                         | Candida parpsilosis bacteremia after NEC, Klebsiella sepsis       |
| P-11 | 28 1/7      | 1000                | 34             | Persistent hypogam (IgG < 25) and sepsis like episodes                                                                                         | History    | 2011 | D-TGA, pulmonary stenosis, CLD, portal hypertension, renal failure requiring peritoneal dialysis | Peritonitis (related to PD cath) with staph and + B-glucan        |
| P-12 | 26 3/7      | 480                 | 32             | Low TRECS on 4 newborn screens                                                                                                                 | TRECS      | 2011 | Severe BPD, IUGR                                                                                 |                                                                   |
| P-13 | 28          | 535                 | 40             | Recurrent infections. Assessed when transferred to our hospital at 3 months of age for PDA ligation.                                           | History    | 2012 | Severe BPD, pulmonary hypertension, IUGR                                                         | Two episodes of Staph aureus sepsis                               |
| P-14 | 26 6/7      | 585                 | 47             | Low TRECS, leukopenia, thrombocytopenia, MRSA infections                                                                                       | History    | 2012 | Mild BPD, history of medical NEC, corneal ulcer, leukopenia, thrombocytopenia, IUGR              | MRSA sepsis, MRSA right eye anterior chamber infection            |

| ID   | GA at birth | Weight at Birth (g) | PMA at testing | Clinical Scenario prompting testing                                                                                                          | Indication | Year | Concurrent Diagnoses                                                         | Significant Infectious History                                                     |
|------|-------------|---------------------|----------------|----------------------------------------------------------------------------------------------------------------------------------------------|------------|------|------------------------------------------------------------------------------|------------------------------------------------------------------------------------|
| P-15 | 24 5/7      | 710                 | 53             | Low TRECS at birth which normalized, T cell lymphopenia after birth. Admitted from rehab hospital for respiratory insufficiency at 6 months. | TRECS      | 2012 | Severe BPD, pulmonary hypertension, grade III IVH                            |                                                                                    |
| P-16 | 25 1/7      | 890                 | 29             | Low TRECS x 3                                                                                                                                | TRECS      | 2013 | BPD, severe IVH, bowel perforation, necrotizing enterocolitis, liver failure | <i>H. flu</i> sepsis, GBS sepsis, MRSA bacteremia, MRSA lung abscess               |
| P-17 | 26          | 791                 | 38             | Low TRECS on fourth NBS                                                                                                                      | TRECS      | 2013 | Severe BPD, renal failure                                                    |                                                                                    |
| P-18 | 26 5/7      | 790                 | 43             | Low TRECS                                                                                                                                    | TRECS      | 2013 | Severe CLD, NEC, short gut, poor wound healing, liver failure                | Cerebral abscess, liver abscess                                                    |
| P-19 | 27          | 875                 | 29             | Low TRECS                                                                                                                                    | TRECS      | 2014 | Mild BPD                                                                     |                                                                                    |
| P-20 | 24 4/7      | 640                 | 29             | Low TRECS                                                                                                                                    | TRECS      | 2015 | Intestinal perforation, grade IV IVH, post hemorrhagic hydrocephalus         |                                                                                    |
| P-21 | 23 2/7      | 550                 | 26             | Low TRECS                                                                                                                                    | TRECS      | 2015 | BPD                                                                          | Citrobacter sedlaki sepsis                                                         |
| P-22 | 27          | 1020                | 37             | Transferred from another NICU at 2 months for sepsis and osteomyelitis                                                                       | History    | 2017 | Prematurity, BPD, medical NEC,                                               | MSSA Osteomyelitis osteo/septic arthritis                                          |
| P-23 | 27          | 960                 | 47             | Low IgG                                                                                                                                      | History    | 2017 | Congenital nephrotic syndrome Finnish type, BPD, pulmonary hypertension      | Multiple tracheitis                                                                |
| P-24 | 26 6/7      | 765                 | 43             | Low TRECS                                                                                                                                    | TRECS      | 2017 | Severe BPD, severe pulmonary hypertension                                    |                                                                                    |
| P-25 | 24 5/7      | 510                 | 35             | Low TRECS                                                                                                                                    | TRECS      | 2017 | NEC, short gut, TPN cholestasis, IVC thrombus                                |                                                                                    |
| P-26 | 24 5/7      | 650                 | 41             | Recurrent sepsis                                                                                                                             | History    | 2017 | Intestinal perforation, persistent anasarca, BPD                             | Klebsiella sepsis, Candida parapsilosis sepsis and recurrent UTI, Staph epi sepsis |
| P-27 | 23          | 555                 | 39             | Low TRECS                                                                                                                                    | TRECS      | 2018 | BPD, NEC, short gut, TPN cholestasis                                         | <i>E faecalis</i> sepsis, MSSA cellulitis                                          |
| P-28 | 26 5/7      | 440                 | 43             | Low TRECS                                                                                                                                    | TRECS      | 2018 | Severe BPD, severe pulmonary hypertension                                    | MRSA pneumonia requiring ECMO (7/12 started), recurrent and unable to clear        |
| P-29 | 26 1/7      | 550                 | 34             | Recurrent sepsis                                                                                                                             | History    | 2018 | BPD, renal failure                                                           | Enterobacter pantoea UTI, MSSA sepsis                                              |

**AVERAGE 26 702 40**

| ID   | NBS TREC level(s)                                | Immune results/recommendations                                                                                                                          | Clinical outcomes                                                                                                                                                                                                                                          |
|------|--------------------------------------------------|---------------------------------------------------------------------------------------------------------------------------------------------------------|------------------------------------------------------------------------------------------------------------------------------------------------------------------------------------------------------------------------------------------------------------|
| P-1  | N/A                                              | Testing reassuring (immunoglobulins and antigen responses) (ordered by pulmonary)                                                                       | Discharged to home, no concern for PID                                                                                                                                                                                                                     |
| P-2  | N/A                                              | Testing abnormal (T cell and NK cell lymphopenia, B cells normal. Normal immunoglobulins and mitogen testing) but thought secondary to anasarca.        | Discharged to home and doing well at 1 year of age, then moved out of the area.                                                                                                                                                                            |
| P-3  | N/A                                              | Testing reassuring (immunoglobulins, lymphocyte subsets, antigen stimulation); PID unlikely                                                             | Remained hospitalized for non-infectious issues, eventually discharged to rehab                                                                                                                                                                            |
| P-4  | N/A                                              | Testing reassuring (immunoglobulins, lymphocyte and T cell subsets, mitogens), no additional work up needed                                             | Discharged to home, seen in immuno clinic at 3y/o for ear infections, testing again reassuring                                                                                                                                                             |
| P-5  | <252 per notes                                   | T and B cell lymphopenia, abnormal response to mitogen stim PHA: avoid live vaccines, follow in clinic                                                  | Seen in clinic, sustained T cell lymphopenia and abnormal mitogen testing but all resolved by 3 years of age. No further infectious problems.                                                                                                              |
| P-6  | Normal                                           | Testing reassuring (immunoglobulins, lymphocyte subsets, mitogens), PID unlikely                                                                        | Died due to other medical problems                                                                                                                                                                                                                         |
| P-7  | Normal                                           | Testing reassuring (immunoglobulins, lymphocyte and T cell subsets, DHR), PID unlikely                                                                  | Discharged to rehab, no further infectious issues                                                                                                                                                                                                          |
| P-8  |                                                  | Testing reassuring (immunoglobulins, lymphocyte subsets), unclear which team recommended, immunology not consulted                                      | Died at 8 months in setting of respiratory and multisystem failure                                                                                                                                                                                         |
| P-9  | Normal                                           | Testing reassuring (immunoglobulins, lymphocyte subsets, CH50); PID unlikely.                                                                           | Discharged to home, went on to develop hydrocephalus and cerebral palsy, no immune issues                                                                                                                                                                  |
| P-10 | <252 at birth, 2 months, 3 months                | Testing abnormal (low T cells, normal % naïve, normal PHA stim) but likely due to prematurity/stress. Recommend follow up labs and avoid live vaccines. | Discharged from NICU and had immuno follow up locally. At 6 years of age in follow up was severely developmentally delayed, tracheostomy and G tube dependent, no immune issues noted.                                                                     |
| P-11 | Normal at birth                                  | Low IgG levels secondary to ongoing losses from post-op chylothoraces. No additional immune testing recommended.                                        | Died due to progressive multiorgan failure                                                                                                                                                                                                                 |
| P-12 | First 4 NBS with low TRECs <252, then normalized | Testing reassuring (immunoglobulins, lymphocyte and T cell memory subsets, mitogen testing), PID unlikely. Repeat testing at 6 months was normal.       | Discharged to home. In follow up at 8 years has autism, developmental delay, no infectious concerns.                                                                                                                                                       |
| P-13 | Normal                                           | Testing with T cell lymphopenia, normal immunoglobulins and neutrophil oxidative index. PID unlikely but avoid live vaccines and will follow.           | Infant died at 4 months of age due to acute arrest. Etiology unclear, autopsy suggested heart failure.                                                                                                                                                     |
| P-14 | First 4 NBS with low TRECs <252, then normalized | Testing abnormal (normal T cells but severely deficient B and NK cells, normal T cell mitogen response)                                                 | Diagnosed with congenital bone marrow failure syndrome, genetic etiology not determined (Ikaros, Schwachman-Diasmon, Fanconi, Dyskeratosis congenita, mpl gene, and microarray all normal). Had BM transplant and is doing well at recent follow up visit. |

| ID   | NBS TREC level(s)                                                 | Immune results/recommendations                                                                                                                                                                                                                                                                                                                                           | Clinical outcomes                                                                                                                                                     |
|------|-------------------------------------------------------------------|--------------------------------------------------------------------------------------------------------------------------------------------------------------------------------------------------------------------------------------------------------------------------------------------------------------------------------------------------------------------------|-----------------------------------------------------------------------------------------------------------------------------------------------------------------------|
| P-15 | First screen <252, then repeats at term corrected age 331 and 659 | Did a phone consult, recommended repeating flow cytometry. Mild CD4+ T cell lymphopenia, PID unlikely, no official recommendations noted.                                                                                                                                                                                                                                | Died from severe pulmonary hypertension                                                                                                                               |
| P-16 | First 3 NBS with low TRECs <252                                   | Testing with low T cells but otherwise reassuring (normal B, NK, and naïve T cell subsets and T cell mitogens). PID unlikely, lymphopenia likely secondary to prematurity and illness.                                                                                                                                                                                   | Died after redirection of care in setting of severe progressive hydrocephalus and inability to intervene given liver failure and coagulopathy                         |
| P-17 | First 3 tests normal, fourth test < 252                           | Testing abnormal (T cell and NK cell lymphopenia, low naïve T cells) but no additional testing done because patient died; lymphopenia likely due to acute illness since earlier TRECs normal.                                                                                                                                                                            | Died after redirection of care in setting of severe hypoxic encephalopathy thought secondary to acidosis from renal failure or potential metabolic disorder           |
| P-18 | Repeated TREC screens <252 through 5 months of life               | Testing abnormal (T cell lymphopenia, low CD4+ naïve cells, low recent thymic emigrants, normal ConA and PHA stimulation but low anti-CD3 stimulation. Immunoglobulins and neutrophil oxidative burst normal). Initially were recommending further SCID variant testing but then decided anti-CD3 result was likely a lab artifact, recommended repeat flow in 4 months. | Care redirected with recurrent bleeding from ostomy, on pressors, HFOV- no autopsy                                                                                    |
| P-19 | First 2 tests <252                                                | Testing reassuring (lymphocyte and T cell subsets); PID unlikely                                                                                                                                                                                                                                                                                                         | Transferred back to referral hospital, doing well at 1 year of age in follow up                                                                                       |
| P-20 | <252, 364, 311, 364, 950                                          | Testing reassuring (lymphocyte and T cell subsets), no note or formal recommendations found in chart                                                                                                                                                                                                                                                                     | Last follow up at 4 yrs old with cerebral palsy, global developmental delay, seizure disorder. No immune issues.                                                      |
| P-21 | <252 x2, 395                                                      | Testing reassuring (lymphocyte and T cell subsets, mitogens), PID unlikely                                                                                                                                                                                                                                                                                               | Discharged to another hospital, no follow up available                                                                                                                |
| P-22 |                                                                   | Not consulted. Testing sent included immunoglobulins, lymphocyte subsets, neutrophil oxidative index, all normal.                                                                                                                                                                                                                                                        | Recovered and transferred back to referral hospital                                                                                                                   |
| P-23 | Normal by report                                                  | IgG replacement not recommended. No further immune evaluation recommended.                                                                                                                                                                                                                                                                                               | Died from nephrotic syndrome with severe lung disease                                                                                                                 |
| P-24 | Initial normal, then low                                          | Testing reassuring (mild T cell lymphopenia with normal naïve % and normal mitogen testing); PID unlikely                                                                                                                                                                                                                                                                | Died at 9mos from severe BPD                                                                                                                                          |
| P-25 | Normal, then <252 x2                                              | Testing reassuring (slightly low T cells but normal naïve % and good mitogen responses), recommended outpatient follow up                                                                                                                                                                                                                                                | Transferred back to referral hospital in another state                                                                                                                |
| P-26 | Normal, then <252 repeatedly                                      | T cell lymphopenia, low switched B cells and absent response to anti-CD3 mitogen. Recommended repeating labs once ALC higher, they were similar but patient died that week.                                                                                                                                                                                              | Died from Klebsiella sepsis; whole exome sequencing sent before death suggestive of novel genetic disease that may have immune system effects, investigation underway |
| P-27 | Low TRECs x 2                                                     | Testing abnormal (low T cells, low recent thymic emigrants). Recommend sending mitogen testing, was not sent.                                                                                                                                                                                                                                                            | Patient transferred back to home facility, additional outcomes unknown.                                                                                               |
| P-28 | <252 x3, 295                                                      | Testing reassuring (immunoglobulins, lymphocyte and T cell subsets, neutrophil oxidative index, T cell mitogens); PID unlikely                                                                                                                                                                                                                                           | Died from severe lung disease                                                                                                                                         |
| P-29 | Normal                                                            | Testing slightly abnormal (low CD8 T cells, low naïve %, but total T cell numbers normal and CD4 normal) but felt not consistent with PID, no further testing recommended.                                                                                                                                                                                               | Died after redirection of care toward comfort measures in setting of evolving periventricular leukomalacia                                                            |
