# Supplementary material
Source: PubMed Central journal article supplement (PMC8287644)
Supplement: NIHMS1579890-supplement-Table_S2.pdf [file NIHMS1579890-supplement-Table_S2.pdf]

|                                            | Reference range | P-1    | P-2     | P-3     | P-4    | P-5      | P-6      |
|--------------------------------------------|-----------------|--------|---------|---------|--------|----------|----------|
| WBC (K cells/uL)                           | 6.85-12.84      | 8.85   | 6.92    | 18.6    | 16.1   | 10.09    | 17.27    |
| ANC (K cells/uL)                           | 2.22-7.11       | 2.04 L | 3.6     | 14.72 H | 11.4   | 3.36     | 13.3 H   |
| ALC (K cells/uL)                           | 1.88-5.39       | 5.22   | 2.7     | 2.24    | 0.97 L | 4.46     | 2.26     |
| % Polys                                    | 16-54           | 23     | 52      | 79      | 71     | 33       | 77       |
| % Lymphs                                   | 16-68           | 59     | 39      | 12      | 6      | 44       | 13       |
| <b>IMMUNOGLOBULINS</b>                     |                 |        |         |         |        |          |          |
| IgG                                        | 200-1200        | 209    | 285     | 447     | 611    | 588      | 659      |
| IgA                                        | 8-90            | 12     | 95      | 19      |        | 40       | 50       |
| IgM                                        | 10-90           | 56     | 86      | 88      |        | 18       | 92 H     |
| IgE                                        | 0-30            |        |         | <5      |        |          |          |
| <b>LYMPHOCYTES</b>                         |                 |        |         |         |        |          |          |
| CD3(%)                                     | 49-84           |        | 28 L    | 70      |        | 74 (f)   | 62       |
| CD3 Abs (cells/uL)                         | 2500-5600       |        | 503 C   | 3,216   |        | 2,075 L  | 1,875 L  |
| CD3/CD4 (%)                                | 31-56           |        | 19 L    | 45      |        | 31       | 35       |
| CD3/CD4 Abs (cells/ uL)                    | 1600-4000       |        | 343 C   | 2,102   |        | 880 L    | 1,051 L  |
| CD3/CD8 (%)                                | 12-24           |        | 9 L     | 23      |        | 41 H     | 26 H     |
| CD3/CD8 Abs (cells/ uL)                    | 500-1700        |        | 163 C   | 1,098   |        | 1,167    | 804      |
| CD3-/CD16 or 65 (%)                        | 3-15            |        | 6       | 10      |        | 9        | 6        |
| CD3-/CD16 or 65 Abs (cells/uL)             | 160-1100        |        | 105 L   | 447     |        | 256      | 194      |
| CD19 (%)                                   | 11-41           |        | 64 H    | 18      |        | 16       | 31       |
| CD19 (Abs) (cell/uL)                       | 430-3000        |        | 1,105   | 800     |        | 462      | 939      |
| CD4/CD8 ratio                              | 1.3-6.3         |        | 2.1     | 1.91    |        | 0.75     | 1.31     |
| T-sum (%)                                  |                 |        |         |         |        |          |          |
| <b>T CELL SUBSETS</b>                      |                 |        |         |         |        |          |          |
| TEMRA CD4+CD45RA+CCR7- T cells (%)         | 0.1-1.9         |        |         |         |        |          |          |
| Naïve CD4+ CD45RA+ CCR7+ T cells (%)       | 76.7-91.4       |        |         |         |        |          |          |
| Eff Mem CD4+ CD45RA- CCR7- T cells (%)     | 1.1-5.3         |        |         |         |        |          |          |
| Central Mem CD4+ CD45RA- CCR7+ T cells (%) | 6.7-15.6        |        |         |         |        |          |          |
| TEMRA CD8+CD45RA+CCR7- T cells (%)         | 1.5-22.7        |        |         |         |        |          |          |
| Naïve CD8+ CD45RA+ CCR7+ T cells (%)       | 62.1-94         |        |         |         |        |          |          |
| Eff Mem CD8+ CD45RA- CCR7- T cells (%)     | 1.3-19.5        |        |         |         |        |          |          |
| Central Mem CD8+ CD45RA- CCR7+ T cells (%) | 0.5-5.6         |        |         |         |        |          |          |
| Naïve CD3+CD4+ (%)                         | 50-85           |        |         |         |        | 75.2 (f) | 78.8 (f) |
| Memory CD3+CD4+ (%)                        | 15-50           |        |         |         |        | 24.8     | 21.2     |
| Naïve CD3+CD8+ (%)                         | 50-85           |        |         |         |        | 46.1     | 93.9     |
| Memory CD3+CD8+ (%)                        | 15-50           |        |         |         |        | 53.9     | 6.1      |
| CD31+ Recent Thymic Emigrants (%)          | 59.7-82.4       |        |         |         |        |          |          |
| <b>B CELL SUBSETS</b>                      |                 |        |         |         |        |          |          |
| Switched mem B cells (IgD- CD27+) (%)      | 1.6-7           |        |         |         |        |          | 2.10 (f) |
| Unswitched mem B cells (IgD+ CD27+) (%)    | 2.8-7.4         |        |         |         |        |          | 5.9      |
| Naïve IgD+ CD27- B cells (%)               | 85.5-93.4       |        |         |         |        |          | 91.2     |
| <b>MITOGENS</b>                            |                 |        |         |         |        |          |          |
| Con A proliferation (CPM)                  | 65,699-239,344  |        | 1452 L  |         |        | 60572 L  |          |
| PHA proliferation (CPM)                    | 96,090-358,179  |        | 166,249 |         |        | 7,790    | 77,756   |
| Anti-CD3 proliferation (CPM)               | 62,927-217,761  |        |         |         |        |          |          |
| T cell mitogen Backgrnd (CPM)              | 204-2104        |        |         |         |        | 443 (f)  | 219 (f)  |
| <b>NEUTROPHILS</b>                         |                 |        |         |         |        |          |          |
| Neutrophil OI                              | >100            |        |         |         |        |          |          |
| % Positive PMNs                            | >95             |        |         |         |        |          |          |

|                                            | Reference range | P-7      | P-8     | P-9    | P-10  | P-11      | P-12    | P-13    |
|--------------------------------------------|-----------------|----------|---------|--------|-------|-----------|---------|---------|
| WBC (K cells/uL)                           | 6.85-12.84      | 7.27     | 6.85    | 6.33 L | 7.01  | 9.74      | 6.38 L  | 11.92   |
| ANC (K cells/uL)                           | 2.22-7.11       | 5.44     | 4.36    | 4.11   | 2.66  | 4.19      | 0.82 L  | 6.81    |
| ALC (K cells/uL)                           | 1.88-5.39       | 1.29 L   | 1.92    | 1.57 L | 2.14  | 3.8       | 4.86    | 2.8     |
| % Polys                                    | 16-54           | 75       | 64      | 65     | 38    | 43        | 13      | 57      |
| % Lymphs                                   | 16-68           | 18       | 28      | 25     | 31    | 39        | 76      | 24      |
| <b>IMMUNOGLOBULINS</b>                     |                 |          |         |        |       |           |         |         |
| IgG                                        | 200-1200        | 509      | 443     | 226 L  | 313   | <75       |         | 245 L   |
| IgA                                        | 8-90            | 113 H    | 72      | 57 H   | 45    | 17        |         | 38      |
| IgM                                        | 10-90           | 48       | 14 L    | 80 H   | 37    | 2         |         | 27      |
| IgE                                        | 0-30            | 2        | 5       | 65 H   |       |           |         |         |
| <b>LYMPHOCYTES</b>                         |                 |          |         |        |       |           |         |         |
| CD3(%)                                     | 49-84           | 74       | 55      | 45 L   | 44 L  |           | 59      | 51      |
| CD3 Abs (cells/uL)                         | 2500-5600       | 2,462    | 1,969   | 776 C  | 732 C |           | 2,574   | 1,681 L |
| CD3/CD4 (%)                                | 31-56           | 50       | 30 L    | 31 L   | 32 L  |           | 17 L    | 24 L    |
| CD3/CD4 Abs (cells/ uL)                    | 1600-4000       | 1,661    | 1,050 L | 534 C  | 540 C |           | 735 C   | 787 C   |
| CD3/CD8 (%)                                | 12-24           | 23       | 24      | 14     | 11 L  |           | 42 H    | 23      |
| CD3/CD8 Abs (cells/ uL)                    | 500-1700        | 757      | 854     | 246 C  | 184 C |           | 1,818 H | 752     |
| CD3-/CD16 or 65 (%)                        | 3-15            | 8        | 7       | 10     | 32 H  |           | 8       | 20 H    |
| CD3-/CD16 or 65 Abs (cells/uL)             | 160-1100        | 271      | 245     | 171    | 533   |           | 346     | 654     |
| CD19 (%)                                   | 11-41           | 17       | 36      | 43 H   | 20    |           | 32      | 28      |
| CD19 (Abs) (cell/uL)                       | 430-3000        | 553 L    | 1,278   | 756    | 341   |           | 1,395   | 928     |
| CD4/CD8 ratio                              | 1.3-6.3         | 2.19     | 1.23 L  | 2.17   | 2.93  |           | 0.40 L  | 1.05 L  |
| T-sum (%)                                  |                 |          |         |        |       |           |         |         |
| <b>T CELL SUBSETS</b>                      |                 |          |         |        |       |           |         |         |
| TEMRA CD4+CD45RA+CCR7- T cells (%)         | 0.1-1.9         |          |         |        |       |           |         |         |
| Naïve CD4+ CD45RA+ CCR7+ T cells (%)       | 76.7-91.4       |          |         |        |       |           |         |         |
| Eff Mem CD4+ CD45RA- CCR7- T cells (%)     | 1.1-5.3         |          |         |        |       |           |         |         |
| Central Mem CD4+ CD45RA- CCR7+ T cells (%) | 6.7-15.6        |          |         |        |       |           |         |         |
| TEMRA CD8+CD45RA+CCR7- T cells (%)         | 1.5-22.7        |          |         |        |       |           |         |         |
| Naïve CD8+ CD45RA+ CCR7+ T cells (%)       | 62.1-94         |          |         |        |       |           |         |         |
| Eff Mem CD8+ CD45RA- CCR7- T cells (%)     | 1.3-19.5        |          |         |        |       |           |         |         |
| Central Mem CD8+ CD45RA- CCR7+ T cells (%) | 0.5-5.6         |          |         |        |       |           |         |         |
| Naïve CD3+CD4+ (%)                         | 50-85           |          |         |        |       | 66.6 (f)  |         |         |
| Memory CD3+CD4+ (%)                        | 15-50           | 81.2 (f) |         |        |       | 33.4      |         |         |
| Naïve CD3+CD8+ (%)                         | 50-85           | 18.8     |         |        |       | 82.1      |         |         |
| Memory CD3+CD8+ (%)                        | 15-50           | 74.3     |         |        |       | 17.9      |         |         |
| CD31+ Recent Thymic Emigrants (%)          | 59.7-82.4       |          |         |        |       |           |         |         |
| <b>B CELL SUBSETS</b>                      |                 |          |         |        |       |           |         |         |
| Switched mem B cells (IgD- CD27+) (%)      | 1.6-7           |          |         |        |       |           |         |         |
| Unswitched mem B cells (IgD+ CD27+) (%)    | 2.8-7.4         |          |         |        |       |           |         |         |
| Naïve IgD+ CD27- B cells (%)               | 85.5-93.4       |          |         |        |       |           |         |         |
| <b>MITOGENS</b>                            |                 |          |         |        |       |           |         |         |
| Con A proliferation (CPM)                  | 65,699-239,344  |          |         |        |       |           |         |         |
| PHA proliferation (CPM)                    | 96,090-358,179  |          |         |        |       | 61,391    |         |         |
| Anti-CD3 proliferation (CPM)               | 62,927-217,761  |          |         |        |       |           |         |         |
| T cell mitogen Backgrnd (CPM)              | 204-2104        |          |         |        |       | 8,722 (f) |         |         |
| <b>NEUTROPHILS</b>                         |                 |          |         |        |       |           |         |         |
| Neutrophil OI                              | >100            |          |         |        |       |           |         | 406 (f) |
| % Positive PMNs                            | >95             |          |         |        |       |           |         | 100     |

|                                            | Reference range | P-14      | P-15    | P-16      | P-17      | P-18          |
|--------------------------------------------|-----------------|-----------|---------|-----------|-----------|---------------|
| WBC (K cells/uL)                           | 6.85-12.84      | 2.95 L    | 5.88 L  | 15.44     | 9.52      | 7.52          |
| ANC (K cells/uL)                           | 2.22-7.11       | 0.94 L    | 5.3     | 7.78 H    | 8 H       | 4.6           |
| ALC (K cells/uL)                           | 1.88-5.39       | 1.74 L    | 1.49 L  | 4.15      | 0.64 L    | 1.49 L        |
| % Polys                                    | 16-54           | 32        | 55      | 50        | 84        | 61            |
| % Lymphs                                   | 16-68           | 59        | 15      | 27        | 7         | 20            |
| <b>IMMUNOGLOBULINS</b>                     |                 |           |         |           |           |               |
| IgG                                        | 200-1200        | 404       |         |           |           | 481           |
| IgA                                        | 8-90            | 38        |         |           |           | 25            |
| IgM                                        | 10-90           | 65        |         |           |           | 39            |
| IgE                                        | 0-30            | 13        |         |           |           |               |
| <b>LYMPHOCYTES</b>                         |                 |           |         |           |           |               |
| CD3(%)                                     | 49-84           | 81        | 70      | 62        | 45 L      | 25 L          |
| CD3 Abs (cells/uL)                         | 2500-5600       | 1,649 L   | 2,221   | 3,179     | 353 C     | 459 C         |
| CD3/CD4 (%)                                | 31-56           | 59 H      | 35      | 44        | 29 L      | 17 L          |
| CD3/CD4 Abs (cells/ uL)                    | 1600-4000       | 1,190 L   | 1,098 L | 2,249     | 228 (f) C | 298 (f) C (c) |
| CD3/CD8 (%)                                | 12-24           | 23        | 32 H    | 17        | 12        | 8 L           |
| CD3/CD8 Abs (cells/ uL)                    | 500-1700        | 466 L     | 1,015   | 858       | 93 C      | 136 C         |
| CD3-/CD16 or 65 (%)                        | 3-15            | 3         | 8       | 21 H      | 26 H      | 18 H          |
| CD3-/CD16 or 65 Abs (cells/uL)             | 160-1100        | 59 C      | 238     | 1,074     | 201       | 324           |
| CD19 (%)                                   | 11-41           | 15        | 19      | 16        | 25        | 55 H          |
| CD19 (Abs) (cell/uL)                       | 430-3000        | 303 L     | 608 L   | 847       | 191 L     | 982           |
| CD4/CD8 ratio                              | 1.3-6.3         | 2.55      | 1.08 L  | 2.62      | 2.46      | 2.19          |
| T-sum (%)                                  |                 | 0         | 3       | 1         | 4         | 1             |
| <b>T CELL SUBSETS</b>                      |                 |           |         |           |           |               |
| TEMRA CD4+CD45RA+CCR7- T cells (%)         | 0.1-1.9         | 0.3 (f)   |         | 1.3 (f)   | 1.1 (f)   | 3.1 (f) H     |
| Naïve CD4+ CD45RA+ CCR7+ T cells (%)       | 76.7-91.4       | 93.0 H    |         | 69.4 L    | 52.8 L    | 67.1 L        |
| Eff Mem CD4+ CD45RA- CCR7- T cells (%)     | 1.1-5.3         | 1.0 L     |         | 10.3 H    | 16.0 H    | 11.1 H        |
| Central Mem CD4+ CD45RA- CCR7+ T cells (%) | 6.7-15.6        | 5.6 L     |         | 19.0 H    | 30.0 H    | 18.7 H        |
| TEMRA CD8+CD45RA+CCR7- T cells (%)         | 1.5-22.7        | 0.5 L     |         | 0.3 L     | 3.9       | 3             |
| Naïve CD8+ CD45RA+ CCR7+ T cells (%)       | 62.1-94         | 92        |         | 91.8      | 62.2      | 92            |
| Eff Mem CD8+ CD45RA- CCR7- T cells (%)     | 1.3-19.5        | 0.8 L     |         | 1.2 L     | 30.4 H    | 2.5           |
| Central Mem CD8+ CD45RA- CCR7+ T cells (%) | 0.5-5.6         | 6.7 H     |         | 6.7 H     | 3.4       | 2.5           |
| Naïve CD3+CD4+ (%)                         | 50-85           | 75.7 (f)  |         |           |           |               |
| Memory CD3+CD4+ (%)                        | 15-50           | 24.3      |         |           |           |               |
| Naïve CD3+CD8+ (%)                         | 50-85           | 79        |         |           |           |               |
| Memory CD3+CD8+ (%)                        | 15-50           | 21        |         |           |           |               |
| CD31+ Recent Thymic Emigrants (%)          | 59.7-82.4       |           |         |           |           | 32.2 (f) L    |
| <b>B CELL SUBSETS</b>                      |                 |           |         |           |           |               |
| Switched mem B cells (IgD- CD27+) (%)      | 1.6-7           | 2.60 (f)  |         |           |           |               |
| Unswitched mem B cells (IgD+ CD27+) (%)    | 2.8-7.4         | 5.6       |         |           |           |               |
| Naïve IgD+ CD27- B cells (%)               | 85.5-93.4       | 88.8      |         |           |           |               |
| <b>MITOGENS</b>                            |                 |           |         |           |           |               |
| Con A proliferation (CPM)                  | 65,699-239,344  | 43174 L   |         | 67,760 L  |           | 107,238       |
| PHA proliferation (CPM)                    | 96,090-358,179  | 339,154   |         | 167,919   |           | 110,574       |
| Anti-CD3 proliferation (CPM)               | 62,927-217,761  | 26,986    |         | 110,920   |           | 584 L         |
| T cell mitogen Backgrnd (CPM)              | 204-2104        | 1,007 (f) |         | 1,630 (f) |           | 186 (f) L     |
| <b>NEUTROPHILS</b>                         |                 |           |         |           |           |               |
| Neutrophil OI                              | >100            |           |         |           |           | 131 (f)       |
| % Positive PMNs                            | >95             |           |         |           |           | 82            |

|                                            | Reference range | P-19      | P-20    | P-21      | P-22    | P-23 | P-24      |
|--------------------------------------------|-----------------|-----------|---------|-----------|---------|------|-----------|
| WBC (K cells/uL)                           | 6.85-12.84      | 12.17     | 16.41   | 28.74 H   | 12.09   |      | 13.5      |
| ANC (K cells/uL)                           | 2.22-7.11       | 5.08      | 8.44 H  | 16.5 H    | 6.2     |      | 10.6 H    |
| ALC (K cells/uL)                           | 1.88-5.39       | 2.32      | 1.8 L   | 5 H       | 3.93    |      | 1.2 L     |
| % Polys                                    | 16-54           | 42        | 51      | 57 H      | 51.3    |      | 79 H      |
| % Lymphs                                   | 16-68           | 19        | 11      | 17        | 32      |      | 9 L       |
| <b>IMMUNOGLOBULINS</b>                     |                 |           |         |           |         |      |           |
| IgG                                        | 200-1200        |           |         |           | 269 L   | <75  |           |
| IgA                                        | 8-90            |           |         |           | 58 H    |      |           |
| IgM                                        | 10-90           |           |         |           | 76 H    |      |           |
| IgE                                        | 0-30            |           |         |           |         |      |           |
| <b>LYMPHOCYTES</b>                         |                 |           |         |           |         |      |           |
| CD3(%)                                     | 49-84           | 86 H      | 73      | 55        | 69      |      | 77        |
| CD3 Abs (cells/uL)                         | 2500-5600       | 2,740     | 2,546   | 1,761 L   | 2,422 L |      | 1,704 L   |
| CD3/CD4 (%)                                | 31-56           | 70 H      | 43      | 42        | 48      |      | 56        |
| CD3/CD4 Abs (cells/ uL)                    | 1600-4000       | 2,221     | 1,480 L | 1,333 L   | 1,677   |      | 1,240 L   |
| CD3/CD8 (%)                                | 12-24           | 16        | 30 H    | 14        | 19      |      | 19        |
| CD3/CD8 Abs (cells/ uL)                    | 500-1700        | 512       | 1,054   | 439 L     | 663     |      | 416 L     |
| CD3-/CD16 or 65 (%)                        | 3-15            | 3 L       | 16      | 7         | 6       |      | 13        |
| CD3-/CD16 or 65 Abs (cells/uL)             | 160-1100        | 109 L     | 545     | 211       | 227     |      | 280       |
| CD19 (%)                                   | 11-41           | 7         | 10      | 34 H      | 23      |      | 9 L       |
| CD19 (Abs) (cell/uL)                       | 430-3000        | 229 L     | 345     | 1,092     | 810     |      | 209 L     |
| CD4/CD8 ratio                              | 1.3-6.3         | 4.34      | 1.4     | 3.03      | 2.53    |      | 2.98      |
| T-sum (%)                                  |                 | 0         | 0.8 (f) | 0         | 2       |      | 2         |
| <b>T CELL SUBSETS</b>                      |                 |           |         |           |         |      |           |
| TEMRA CD4+CD45RA+CCR7- T cells (%)         | 0.1-1.9         | 2.6 (f) H | 74.1 L  | 2.5 (f) H |         |      | 6.2 (f) H |
| Naïve CD4+ CD45RA+ CCR7+ T cells (%)       | 76.7-91.4       | 84        | 10.0 H  | 73.1 L    |         |      | 85.7      |
| Eff Mem CD4+ CD45RA- CCR7- T cells (%)     | 1.1-5.3         | 6.8 H     | 15.2    | 9.6 H     |         |      | 3.9       |
| Central Mem CD4+ CD45RA- CCR7+ T cells (%) | 6.7-15.6        | 6.6 L     | 0.8 L   | 14.8      |         |      | 4.3 L     |
| TEMRA CD8+CD45RA+CCR7- T cells (%)         | 1.5-22.7        | 1.3 L     | 94.3 H  | 1.4 L     |         |      | 0.5 L     |
| Naïve CD8+ CD45RA+ CCR7+ T cells (%)       | 62.1-94         | 88.2      | 0.6 L   | 82.8      |         |      | 96.6 H    |
| Eff Mem CD8+ CD45RA- CCR7- T cells (%)     | 1.3-19.5        | 3.1       | 4.2     | 1.7       |         |      | 1.5       |
| Central Mem CD8+ CD45RA- CCR7+ T cells (%) | 0.5-5.6         | 7.3 H     |         | 14.0 H    |         |      | 1.3       |
| Naïve CD3+CD4+ (%)                         | 50-85           |           |         |           |         |      |           |
| Memory CD3+CD4+ (%)                        | 15-50           |           |         |           |         |      |           |
| Naïve CD3+CD8+ (%)                         | 50-85           |           |         |           |         |      |           |
| Memory CD3+CD8+ (%)                        | 15-50           |           |         |           |         |      |           |
| CD31+ Recent Thymic Emigrants (%)          | 59.7-82.4       |           |         |           |         |      |           |
| <b>B CELL SUBSETS</b>                      |                 |           |         |           |         |      |           |
| Switched mem B cells (IgD- CD27+) (%)      | 1.6-7           |           |         |           |         |      |           |
| Unswitched mem B cells (IgD+ CD27+) (%)    | 2.8-7.4         |           |         |           |         |      |           |
| Naïve IgD+ CD27- B cells (%)               | 85.5-93.4       |           |         |           |         |      |           |
| <b>MITOGENS</b>                            |                 |           |         |           |         |      |           |
| Con A proliferation (CPM)                  | 65,699-239,344  |           |         |           |         |      | 281,750 H |
| PHA proliferation (CPM)                    | 96,090-358,179  |           |         |           |         |      | 293,920   |
| Anti-CD3 proliferation (CPM)               | 62,927-217,761  |           |         |           |         |      | 74,756    |
| T cell mitogen Backgrnd (CPM)              | 204-2104        |           |         |           |         |      | 383 (f)   |
| <b>NEUTROPHILS</b>                         |                 |           |         |           |         |      |           |
| Neutrophil OI                              | >100            |           |         |           | 164 (f) |      |           |
| % Positive PMNs                            | >95             |           |         |           | 63      |      |           |

|                                            | Reference range | P-25      | P-26          | P-27       | P-28       | P-29    |
|--------------------------------------------|-----------------|-----------|---------------|------------|------------|---------|
| WBC (K cells/uL)                           | 6.85-12.84      | 9.26      | 7.85 L        | 9.69       | 12.07      | 22.53 H |
| ANC (K cells/uL)                           | 2.22-7.11       | 3.94      | 4.86          | 5.65       | 8.53 H     | 7.98 H  |
| ALC (K cells/uL)                           | 1.88-5.39       | 3.03      | 0.49 L        | 1.92       | 2.12       | 7.98 H  |
| % Polys                                    | 16-54           | 42.5      | 61.9          | 58.4 H     | 70.7 H     | 35.4    |
| % Lymphs                                   | 16-68           | 33        | 6 L           | 19.8       | 17.6       | 35      |
| <b>IMMUNOGLOBULINS</b>                     |                 |           |               |            |            |         |
| IgG                                        | 200-1200        |           | 96 L          |            | 368        | 117 L   |
| IgA                                        | 8-90            |           |               |            | 25         |         |
| IgM                                        | 10-90           |           |               |            | 22         |         |
| IgE                                        | 0-30            |           |               |            | 5          |         |
| <b>LYMPHOCYTES</b>                         |                 |           |               |            |            |         |
| CD3(%)                                     | 49-84           | 49        | 35 L          | 56         | 68         | 60      |
| CD3 Abs (cells/uL)                         | 2500-5600       | 1,890 L   | 205 L         | 1,021 L    | 2,637      | 2,714   |
| CD3/CD4 (%)                                | 31-56           | 32 L      | 26 L          | 35         | 42         | 50      |
| CD3/CD4 Abs (cells/ uL)                    | 1600-4000       | 1,238 L   | 151 (f) C (c) | 638 L      | 1,614      | 2,243   |
| CD3/CD8 (%)                                | 12-24           | 17        | 9 L           | 18         | 26 H       | 10 L    |
| CD3/CD8 Abs (cells/ uL)                    | 500-1700        | 646       | 53 L          | 331 L      | 989        | 453 L   |
| CD3-/CD16 or 65 (%)                        | 3-15            | 7         | 28 H          | 14         | 6          | 5       |
| CD3-/CD16 or 65 Abs (cells/uL)             | 160-1100        | 269       | 167           | 259        | 225        | 239     |
| CD19 (%)                                   | 11-41           | 41 H      | 35 H          | 26         | 25         | 33 H    |
| CD19 (Abs) (cell/uL)                       | 430-3000        | 1,584     | 203 L         | 474        | 960        | 1,468   |
| CD4/CD8 ratio                              | 1.3-6.3         | 1.92      | 2.83          | 1.93       | 1.63       | 4.95    |
| T-sum (%)                                  |                 | 0         | 0             | 3          | 1          | 0       |
| <b>T CELL SUBSETS</b>                      |                 |           |               |            |            |         |
| TEMRA CD4+CD45RA+CCR7- T cells (%)         | 0.1-1.9         | 2.6 (f) H | 2.4 (f) H     | 1.8 (f)    | 0.8 (f)    | 0.5 (f) |
| Naïve CD4+ CD45RA+ CCR7+ T cells (%)       | 76.7-91.4       | 82.4      | 53.8 L        | 70.9 L     | 82.9       | 64.0 L  |
| Eff Mem CD4+ CD45RA- CCR7- T cells (%)     | 1.1-5.3         | 6.2 H     | 24.5 H        | 9.4 H      | 3.7        | 11.1 H  |
| Central Mem CD4+ CD45RA- CCR7+ T cells (%) | 6.7-15.6        | 8.7       | 19.2 H        | 18.0 H     | 12.6       | 24.4 H  |
| TEMRA CD8+CD45RA+CCR7- T cells (%)         | 1.5-22.7        | 1.5       | 4.2           | 1.2 L      | 0.5 L      | 0.8 L   |
| Naïve CD8+ CD45RA+ CCR7+ T cells (%)       | 62.1-94         | 85.3      | 83.5          | 92.3       | 93.7       | 78.3    |
| Eff Mem CD8+ CD45RA- CCR7- T cells (%)     | 1.3-19.5        | 3.1       | 9.1           | 4          | 0.8 L      | 2.4     |
| Central Mem CD8+ CD45RA- CCR7+ T cells (%) | 0.5-5.6         | 10.0 H    | 3.2           | 2.6        | 5.1        | 18.5 H  |
| Naïve CD3+CD4+ (%)                         | 50-85           |           |               |            |            |         |
| Memory CD3+CD4+ (%)                        | 15-50           |           |               |            |            |         |
| Naïve CD3+CD8+ (%)                         | 50-85           |           |               |            |            |         |
| Memory CD3+CD8+ (%)                        | 15-50           |           |               |            |            |         |
| CD31+ Recent Thymic Emigrants (%)          | 59.7-82.4       |           |               | 33.2 (f) L |            |         |
| <b>B CELL SUBSETS</b>                      |                 |           |               |            |            |         |
| Switched mem B cells (IgD- CD27+) (%)      | 1.6-7           |           |               |            | 1.20 (f) L |         |
| Unswitched mem B cells (IgD+ CD27+) (%)    | 2.8-7.4         |           |               |            | 2.8        |         |
| Naïve IgD+ CD27- B cells (%)               | 85.5-93.4       |           |               |            | 95.60 H    |         |
| <b>MITOGENS</b>                            |                 |           |               |            |            |         |
| Con A proliferation (CPM)                  | 65,699-239,344  | 184,752   |               |            |            |         |
| PHA proliferation (CPM)                    | 96,090-358,179  | 210,614   |               |            |            |         |
| Anti-CD3 proliferation (CPM)               | 62,927-217,761  | 6,093 L   |               |            |            |         |
| T cell mitogen Backgrnd (CPM)              | 204-2104        | 319 (f)   |               |            |            |         |
| <b>NEUTROPHILS</b>                         |                 |           |               |            |            |         |
| Neutrophil OI                              | >100            |           |               |            | 206 (f)    |         |
| % Positive PMNs                            | >95             |           |               |            | 99         |         |
